# Supplementary material
Source: Research Square preprint supplement (doi:10.21203/rs.3.rs-9149033/v1)
Supplement: Supplementary file 1 [file eaf74034e99a4ad954c39212.docx]

Table 1 Primer sequences table.

| **Primer** | **Sequence** |
| --- | --- |
| SLC47A1 F | GCCAAGAAGAACCTTTGCCG |
| SLC47A1 R | TGGGCCTGTGAATTGTGTGT |
| ATP5F1E F | CGCTTTCGCTACAGCATGG |
| ATP5F1E R | CCCACACATCTTCACCTTGGA |
| GAPDH F | CGAAGGTGGAGTCAACGGATTT |
| GAPDH R | ATGGGTGGAATCATATTGGAAC |
